# Supplementary material for: Acquisition of the contractile phenotype by murine arterial smooth muscle cells depends on the Mir143/145 gene cluster
Source: JCI journal article supplement (doi:10.1172/jci38864), 2009-08-13
Supplement: sd1 [file 1]

301 Moved Permanently

# Moved Permanently

The document has moved here.
